# Supplementary material
Source: PubMed Central journal article supplement (PMC4345556)
Supplement: pnas.201417047SI.pdf [file pnas.201417047SI.pdf]

# Supporting Information

Samuel et al. 10.1073/pnas.1417047112

## SI Materials

DEPMPO was obtained from Santa Cruz Labs. Amplex Red was purchased from Life Technologies. Ferrous sulfate heptahydrate ( $\text{FeSO}_4 \cdot 7\text{H}_2\text{O}$ ), cupric sulfate pentahydrate ( $\text{CuSO}_4 \cdot 5\text{H}_2\text{O}$ ), nitric acid ( $\text{HNO}_3$ ),  $\text{H}_2\text{O}_2$  (30% in water), potassium phosphate monobasic ( $\text{KH}_2\text{PO}_4$ ), potassium permanganate ( $\text{KMnO}_4$ ), ethanol (EtOH), sulfuric acid ( $\text{H}_2\text{SO}_4$ ), and sodium hydroxide (NaOH) were purchased from Fisher Scientific. Potassium phosphate dibasic ( $\text{K}_2\text{HPO}_4$ ) was purchased from J. T. Baker. Methoxypolyethylene glycol amine [PEG, molecular weight (MW) 5,000], Chelex, EDTA tetrasodium salt hydrate (EDTA), catalase from bovine liver, triethanolamine (TEA), methylsulfoxide (DMSO), sodium perchlorate ( $\text{NaClO}_4$ ), HRP, deferoxamine mesylate (DFO), 2,2'-azino-bis(3-ethylbenzothiazoline-6-sulfonic acid) diammonium salt (ABTS), pyrogallol, sodium nitrite ( $\text{NaNO}_2$ ), ascorbic acid (acid form), caffeic acid, ( $\pm$ )-6-hydroxy-2,5,7,8-tetramethylchromane-2-carboxylic acid (Trolox), hypoxanthine (HX), cytochrome *c* from equine heart, xanthine oxidase (XO), SOD from bovine erythrocytes (EC 1.15.1.1), CAPS, CHES, TAPS, and Hepes were purchased from Sigma-Aldrich. Crown ether (18-crown-6) was purchased from Fluka. Potassium superoxide ( $\text{KO}_2$ ) was obtained from Acros Organics. The inductively coupled plasma standard for iron and the dialysis membrane [molecular weight cutoff (MWCO) 1,000 and MWCO 5,000] were purchased from High Purity standards and Biotech, respectively. Human oxyhemoglobin ( $\text{HbO}_2$ ) was a gift from J. S. Olson, Rice University, Houston.  $\text{C}_{60}$ -serinol was donated by Lon Wilson, Rice University, Houston, and  $\text{C}_3$  was donated by Douglas DeWitt, The University of Texas Medical Branch, Galveston, TX.

## SI Methods

**PEG-HCCs.** HCCs were prepared by oxidizing single-walled carbon nanotubes using a mixture of oleum and nitric acid. These HCCs were then PEGylated using 5,000-MW  $\alpha$ -amino- $\omega$ -methoxy PEG via standard carbodiimide coupling chemistry (1). The concentration of PEG-HCCs in solution is estimated based on the carbon core absorbance at 763 nm using an extinction coefficient of 0.01040 L/mg or 0.00428  $\text{nM}^{-1}$  (1). The MW of the PEG-HCCs (411,509 g/mol) was estimated based on weight loss percentages obtained from thermogravimetric plots of the HCCs and PEG-HCCs. See Fig. S8 for calculations.

**Oxyhemoglobin  $\text{NO}^\bullet$  Scavenging Assay.** Oxyhemoglobin ( $\text{HbO}_2$ , 8  $\mu\text{M}$  based on heme content,  $\epsilon_{425\text{nm}} = 125 \text{ mM}^{-1} \cdot \text{cm}^{-1}$ ) was dissolved in TEA buffer (50 mM, pH 7.5). The  $\text{NO}^\bullet$  solution was prepared by bubbling NaOH trap-purified 99.9% pure  $\text{NO}^\bullet$  gas (Matheson) through 10 mL of anaerobic TEA (50 mM, pH 7.5) for 10 min. An  $\sim 2 \text{ mM}$  solution of  $\text{NO}^\bullet$  was obtained at atmospheric pressure and kept in a glass tonometer (2). The  $\text{HbO}_2$  and the PEG-HCCs were mixed in the quartz cuvette before initiating

the reaction with the addition of  $\text{NO}^\bullet$ . The final metHb concentration was  $9.7 \pm 0.3 \mu\text{M}$  ( $\epsilon_{401-411\text{nm}} = 38 \text{ mM}^{-1} \cdot \text{cm}^{-1}$ ) (3), and 0.02 mg/mL of both PEG-HCCs (48.6 nM) and PEG (4000 nM). The UV spectra were measured using a Hewlett-Packard 8453 diode array spectrophotometer.

**$\text{NO}^\bullet$  Scavenging Assay by  $\text{HbO}_2$  Using Anaerobic Sequential Stopped Flow and Preincubation of the  $\text{NO}^\bullet$  with PEG-HCCs.**  $\text{NO}^\bullet$  radicals were incubated with the PEG-HCCs at three different aging times before mixing with  $\text{HbO}_2$  using the sequential mode of an Applied Photophysics model SX-18MV stopped-flow instrument with a rapid-scan diode array accessory. The instrument was located inside an anaerobic chamber model 110 V equipped with a gas analyzer model 10 (Coy Laboratory Products) for tracking the  $\text{H}_2$  and  $\text{O}_2$  levels. The chamber was filled with 10%  $\text{H}_2$  in  $\text{N}_2$  (4). The following stock solutions were prepared using TEA (50 mM, pH 7.4): PEG-HCCs (194.4 nM or 0.08 mg/mL) in aerobic buffer,  $\text{NO}^\bullet$  (20  $\mu\text{M}$ ) in anaerobic buffer and  $\text{HbO}_2$  (15  $\mu\text{M}$ ) in air-saturated buffer. Either buffer (control) or PEG-HCCs were incubated with  $\text{NO}^\bullet$  in a 1:1 ratio for 20 ms, 1 s, or 1 min in the aging loop after first mixing. This solution was then further mixed with  $\text{HbO}_2$  in a 1:1 ratio in the detector chamber. Note that 0.04 mg/mL (97.2 nM) was the concentration of the PEG-HCCs when it was incubated with  $\text{NO}^\bullet$  and 0.02 mg/mL (48.6 nM) when it was mixed with  $\text{HbO}_2$ , thus an overall 4 $\times$  dilution after two-stage mixing.

**ONOO<sup>-</sup> Scavenging Assay.** A 12-mL aqueous solution containing 4 g  $\text{NaNO}_2$  was added to a 125-mL aqueous solution containing 7.5 mL 35%  $\text{H}_2\text{O}_2$  and 2 mL 96%  $\text{H}_2\text{SO}_4$ . This mixture was immediately poured into 250 mL solution containing 12.5 g NaOH. To remove unreacted  $\text{H}_2\text{O}_2$ ,  $\text{MnO}_2$  was added to the final mixture and allowed to stand for 15 min. The concentration of ONOO<sup>-</sup> was determined to be 1.73 mM using the absorbance maximum at 302 nm ( $\epsilon = 1,670 \text{ M}^{-1} \cdot \text{cm}^{-1}$ ). ONOO<sup>-</sup> was portioned into 1.5-mL aliquots and frozen; during use, the ONOO<sup>-</sup> was kept on ice. Solutions of antioxidants (ascorbic acid, caffeic acid, PEG-HCCs, and Trolox) were prepared at 0.100 mg/mL (243.0 nM) in phosphate buffer. Pyrogallol red was prepared at 5 mM in phosphate buffer. Assays were done in methacrylate cuvettes. Typically, 25  $\mu\text{L}$  of pyrogallol red stock solution was added to the cuvette, followed by phosphate buffer, antioxidant (10, 30, 50, 100, or 200  $\mu\text{L}$ ) and finally ONOO<sup>-</sup> (the final volume was 1.5 mL). The cuvette was inverted several times after the addition of the ONOO<sup>-</sup>. The absorbance spectrum from 300–700 nm was measured. Each assay was carried out in triplicate. Control samples were the pyrogallol red in the absence of antioxidant and ONOO<sup>-</sup>, as well as pyrogallol red in the presence of ONOO<sup>-</sup> without antioxidant. The absorbance change at 540 nm ( $\epsilon = 2.4 \times 10^4 \text{ M}^{-1} \cdot \text{cm}^{-1}$ ) was used in inhibition calculations (5).

- Berlin JM, et al. (2010) Effective drug delivery, in vitro and in vivo, by carbon-based nanovectors noncovalently loaded with unmodified Paclitaxel. *ACS Nano* 4(8): 4621–4636.
- Xia Y, Tsai A-L, Berka V, Zweier JL (1998) Superoxide generation from endothelial nitric-oxide synthase. A Ca<sup>2+</sup>/calmodulin-dependent and tetrahydrobiopterin regulatory process. *J Biol Chem* 273(40):25804–25808.
- Petlicki J, van de Ven TGM (1998) The equilibrium between the oxidation of hydrogen peroxide by oxygen and the dismutation of peroxy or superoxide radicals

- in aqueous solutions in contact with oxygen. *J Chem Soc, Faraday Trans* 94: 2763–2767.
- Berka V, Wu G, Yeh H-C, Palmer G, Tsai A-L (2004) Three different oxygen-induced radical species in endothelial nitric-oxide synthase oxygenase domain under regulation by L-arginine and tetrahydrobiopterin. *J Biol Chem* 279(31):32243–32251.
- Feelisch M, Noack EA (1987) Correlation between nitric oxide formation during degradation of organic nitrates and activation of guanylatecyclase. *Eur J Pharmacol* 139(1): 19–30.









According to the TGA plots

- Weight loss of the HCC: 58
- Weight loss of the PEG-HCCs: 84

HCCs amount = 100 – 84 = 16

$$\text{moles of HCCs} = \frac{16}{12 \frac{\text{g}}{\text{mol}}} = 1.33 \text{ moles} \quad (\text{The O atoms were ignored, MW of carbon} = 12 \text{ g/mol})$$

$$\text{Functionality in HCCs} = \left( \frac{58}{100 - 58} \right) * (100 - 84) = 22.08$$

Amount of PEG = 84 – 22.08 = 61.92

$$\text{moles of PEG} = \frac{61.92}{5000 \frac{\text{g}}{\text{mol}}} = 0.0124 \text{ moles}$$

$$\text{Ratio of functionalization} = \frac{\text{moles of C}}{\text{moles of PEG}} = \frac{1.33}{0.0124} \approx 107$$

**1 PEG every 107 carbons**

Molecular weight

Assumption: 137 carbons atoms/nm -----> 40 nm HCCs -----> 5480 C atoms

$$\# \text{ of PEG chains} = \frac{5480}{107} = 51$$

$$\text{Molecular weight of PEG - HCCs} = \left( 5480 * 12 \frac{\text{g}}{\text{mol}} \right) * \frac{22.08}{16} + \left( 5480 * 12 \frac{\text{g}}{\text{mol}} \right) + \left( 51 * 5000 \frac{\text{g}}{\text{mol}} \right) = 411509 \frac{\text{g}}{\text{mol}}$$

$$\text{Molecular weight of HCCs} = \underbrace{\left( 5480 * 12 \frac{\text{g}}{\text{mol}} \right)}_{\text{Carbon core}} + \underbrace{\left( 5480 * 12 \frac{\text{g}}{\text{mol}} \right) * \frac{22.08}{16}}_{\text{Functionality}} = 156509 \frac{\text{g}}{\text{mol}}$$

Fig. S8. MW estimation of the PEG-HCCs.

**Table S1. Hyperfine constants used in simulating the EPR spectra of the DEPMPO-OOH and DEPMPO-OH adducts**

| Adduct                                                                 | Element | No. | Isotope | Spin | Abundance | a, G  |
|------------------------------------------------------------------------|---------|-----|---------|------|-----------|-------|
| DEPMPO-OOH                                                             | P       | 1   | 31      | 1/2  | 100.00    | 49.80 |
|                                                                        | N       | 1   | 14      | 1    | 99.64     | 13.30 |
|                                                                        |         |     | 15      | 1/2  | 0.36      | 19.00 |
|                                                                        | H       | 1   | 1       | 1/2  | 99.99     | 11.00 |
| g = 2.00504                                                            |         |     | 2       | 1    | 0.01      | 1.40  |
| Lorentzian/Gaussian:1.0 (meaning fully Lorentzian)<br>linewidth: 1.2 G | H(r)    | 1   | 1       | 1/2  | 99.99     | 1.00  |
| DEPMPO-OH                                                              |         |     | 2       | 1    | 0.01      | 0.14  |
|                                                                        | P       | 1   | 31      | 1/2  | 100.00    | 47.55 |
|                                                                        | N       | 1   | 14      | 1    | 99.64     | 14.00 |
|                                                                        |         |     | 15      | 1/2  | 0.36      | 21.00 |
| g = 2.00455                                                            | H       | 1   | 1       | 1/2  | 99.99     | 13.20 |
| Lorentzian/Gaussian:1.0 (meaning fully Lorentzian)<br>linewidth: 1.5 G |         |     | 2       | 1    | 0.01      | 1.80  |

**Table S2. Relative percent of antioxidant activity**

| Sample                       |                       | Average of the EPR amplitude <sup>†</sup> | SD    | SE    | Relative % of antioxidant activity |
|------------------------------|-----------------------|-------------------------------------------|-------|-------|------------------------------------|
| O <sub>2</sub> <sup>•-</sup> | Control               | 28,782                                    | 3,833 | 2,213 | NA                                 |
|                              | PEG                   | 23,774                                    | 6,408 | 3,700 | 13 ± 30 <sup>§</sup>               |
|                              | PEG-HCCs <sup>‡</sup> | 433                                       | 320   | 185   | 98 ± 16 <sup>§</sup>               |
| •OH                          | Control               | 15,242                                    | 3,594 | 2,075 | NA                                 |
|                              | PEG <sup>¶</sup>      | 12,277                                    | 1,488 | 1,052 | 19 ± 5 <sup>§</sup>                |
|                              | PEG-HCCs              | 4,165                                     | 499   | 288   | 73 ± 20 <sup>§</sup>               |

Calculated from [% = ((Control amplitude – PEG-HCCs or PEG amplitude)/Control amplitude) × 100%]. Experiments were carried out in triplicate. A quality control sample was run every three samples. NA, not applicable.

<sup>†</sup>EPR amplitude of the signal at 3,278 G and 3,308 G for the O<sub>2</sub><sup>•-</sup> and •OH scavenging experiments, respectively.

<sup>‡</sup>Absolute value.

<sup>§</sup>Error propagation from arithmetic calculations using SDs.

<sup>¶</sup>Experiment run in duplicate.
